# Supplementary material
Source: publisher figshare collection journal article supplement (https://acs.figshare.com/ndownloader/files/3727342)
Supplement: Supplementary file 1 [file 3727342]

## Supporting Information

### Structural Correspondence of the Oriented Attachment Growth Mechanism of Crystals of the Pharmaceutical Dirithromycin

Zuozhong Liang,<sup>†</sup> Yuan Wang,<sup>†</sup> Wei Wang,<sup>†</sup> Xianglong Han,<sup>†</sup> Jian-Feng Chen,<sup>\*,†,‡</sup>

Chunyu Xue,<sup>\*,§</sup> Hong Zhao<sup>\*,†</sup>

<sup>†</sup> State Key Laboratory of Organic-Inorganic Composites, Beijing University of  
Chemical Technology, Beijing 100029, China

<sup>‡</sup> Research Center of the Ministry of Education for High Gravity Engineering and  
Technology, Beijing University of Chemical Technology, Beijing 100029, China

<sup>§</sup> Biomass Energy and Environmental Engineering Research Center, Beijing  
University of Chemical Technology, Beijing 100029, China

Corresponding authors:

Email: [chenjf@mail.buct.edu.cn](mailto:chenjf@mail.buct.edu.cn); Tel: +86-10-64446466;

E-mail: [xuecy@mail.buct.edu.cn](mailto:xuecy@mail.buct.edu.cn); Tel: +86-10-64442375;

E-mail: [zhaohong@mail.buct.edu.cn](mailto:zhaohong@mail.buct.edu.cn); Tel.: +86-10-64433134;

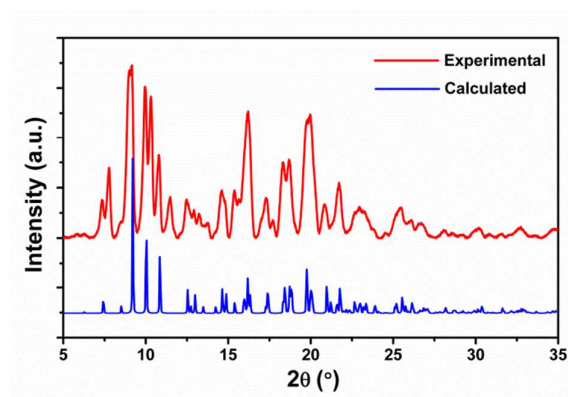

**Figure S1.** Experimental and calculated (Form II) X-ray diffraction patterns of DIR raw materials.

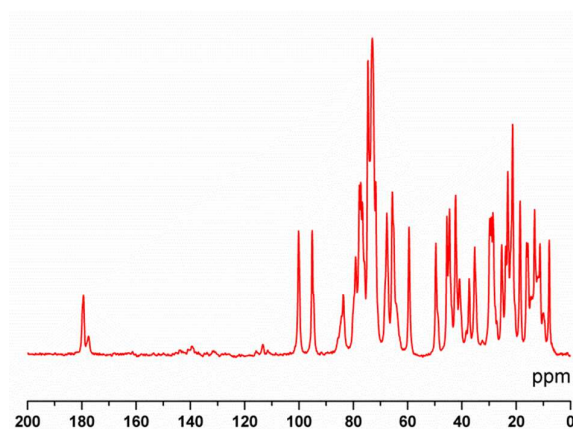

**Figure S2.**  $^{13}\text{C}$  solid-state NMR spectrum of the raw material DIR.

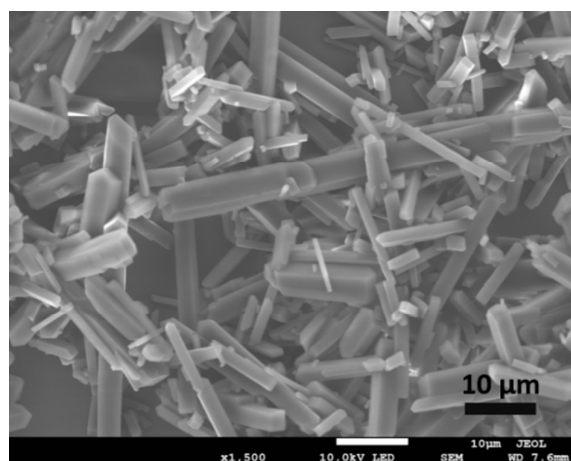

**Figure S3.** SEM image of the precursors of DIR crystals in DMF solvent.

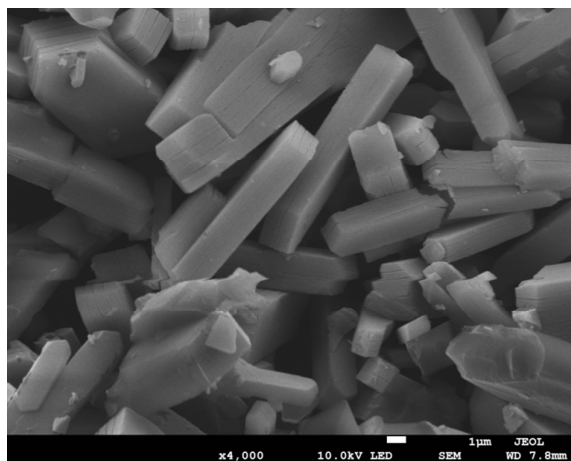

**Figure S4.** SEM characterization of the DIR in DMF solvent by solvothermal method at 40 °C for 24h.

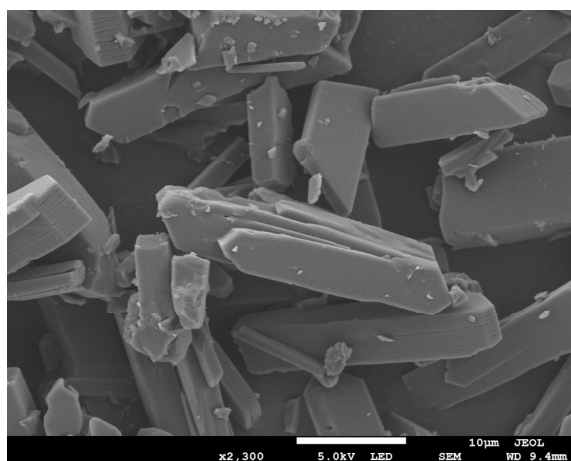

**Figure S5.** SEM characterization of the DIR in DMF solvent by solvothermal method at 40 °C for 48h.

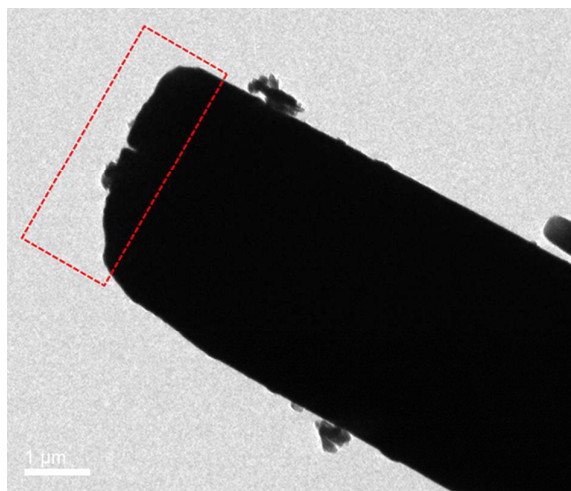

**Figure S6.** TEM image of DIR crystals in DMF solvent by solvothermal treatment at 40 °C for 48h.

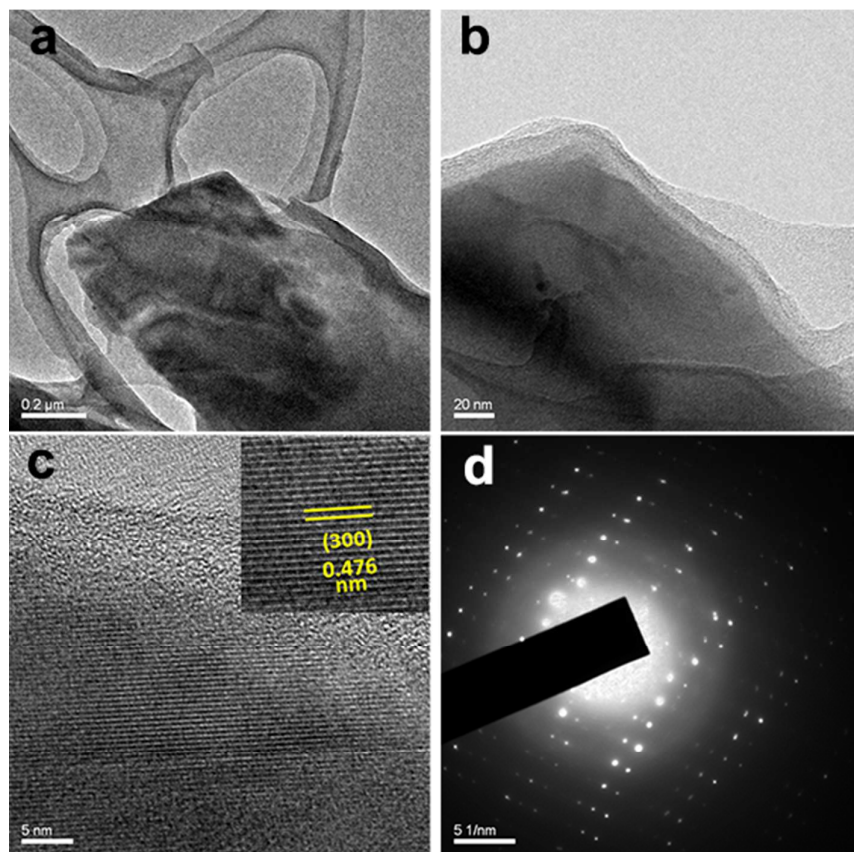

**Figure S7.** TEM images (a & b), high-resolution TEM (HRTEM) image (c), and their SAED pattern (d) of solvothermal synthesized DIR crystals at 40 °C for 48h.

**Table S1.**  $E_{\text{surf}}(\text{Total})$ ,  $E_{\text{surf}}(\text{vdW})$ ,  $E_{\text{surf}}(\text{Electrostatic})(\text{J}/\text{m}^2)$ , and total surface areas (%) for equilibrium morphology of DIR.

| Face   | $E_{\text{surf}}(\text{Total})$ | $E_{\text{surf}}(\text{vdW})$ | $E_{\text{surf}}(\text{Electrostatic})$ | Area   |
|--------|---------------------------------|-------------------------------|-----------------------------------------|--------|
| (001)  | 0.151                           | 0.136                         | 0.015                                   | 18.56% |
| (100)  | 0.158                           | 0.156                         | 0.002                                   | 7.74%  |
| (10-1) | 0.156                           | 0.145                         | 0.010                                   | 3.27%  |
| (101)  | 0.204                           | 0.193                         | 0.011                                   | 0.38%  |

|         |       |       |       |        |
|---------|-------|-------|-------|--------|
| (011)   | 0.175 | 0.165 | 0.010 | 1.39%  |
| (0-11)  | 0.175 | 0.165 | 0.010 | 1.39%  |
| (110)   | 0.136 | 0.134 | 0.002 | 16.05% |
| (1-10)  | 0.136 | 0.134 | 0.002 | 16.05% |
| (11-1)  | 0.142 | 0.135 | 0.007 | 10.35% |
| (1-1-1) | 0.142 | 0.135 | 0.007 | 10.35% |
| (111)   | 0.179 | 0.168 | 0.01  | 1.66%  |
| (1-11)  | 0.179 | 0.168 | 0.01  | 1.66%  |

**Table S2.** The  $a$ ,  $b$ , and  $c$  (Å) of the modelling box and area values ( $A_{\text{hkl}}$  and  $A_{\text{box}}$ ; Å<sup>2</sup>) for main exposed faces of DIR growth morphology.

| Faces  | $a$   | $b$   | $c$   | $A_{\text{hkl}}$ | $A_{\text{box}}$ |
|--------|-------|-------|-------|------------------|------------------|
| (001)  | 43.11 | 35.09 | 89.87 | 1512.73          | 17081            |
| (100)  | 35.09 | 44.09 | 89.54 | 1547.00          | 17273            |
| (10-1) | 35.09 | 58.98 | 90.97 | 2069.61          | 21254            |
| (011)  | 43.12 | 56.34 | 92.73 | 2429.38          | 23304            |
| (0-11) | 43.12 | 56.34 | 94.11 | 2429.38          | 23579            |
| (110)  | 44.09 | 55.59 | 84.34 | 2450.96          | 23716            |
| (1-10) | 55.59 | 44.09 | 86.14 | 2450.96          | 22074            |

**Table S3.** The area values ( $A_{\text{acc}}$  and  $A_{\text{hkl}}$ ; Å<sup>2</sup>) and correction factor  $S$  ( $S=A_{\text{acc}}/A_{\text{hkl}}$ ) of 3D supercells of three cleaved surfaces including (001), (100) and (110) with dimensions  $2a \times 2b \times 3c$ . Here, the  $A_{\text{acc}}$  indicates the accessible solvent surface and the  $A_{\text{hkl}}$  stands for the top surface area ( $2a \times 2b$ ) of a supercell.

| Faces | $A_{\text{acc}}$ | $A_{\text{hkl}}$ | $S$   |
|-------|------------------|------------------|-------|
| (001) | 832.11           | 672.36           | 1.238 |
| (100) | 924.24           | 687.48           | 1.344 |
| (110) | 1323.92          | 1089.16          | 1.216 |

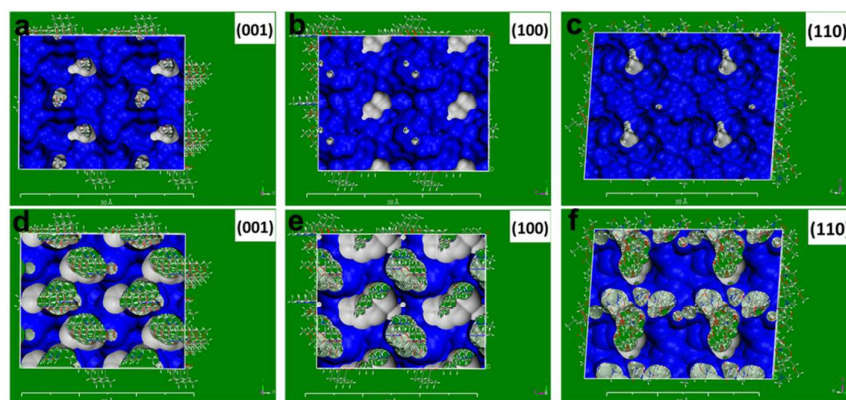

**Figure S8.** Connolly surfaces (a, b, and c) and accessible solvent surfaces (d, e, and f) of three crystal faces (001), (100) and (110).

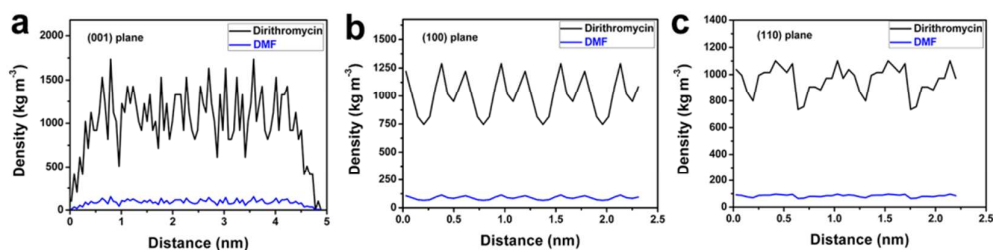

**Figure S9.** Density profiles for crystalline DIR at the (001) plane (a), (100) plane (b), and (110) plane (c) as a function of distance.

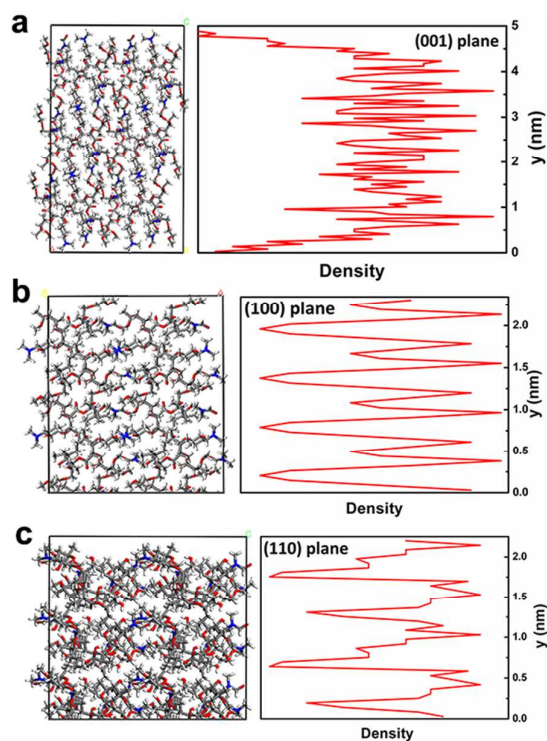

**Figure S10.** Visual illustration of the interfacial distribution of compounds along with the density profiles side by side at three planes (001), (100), and (110).

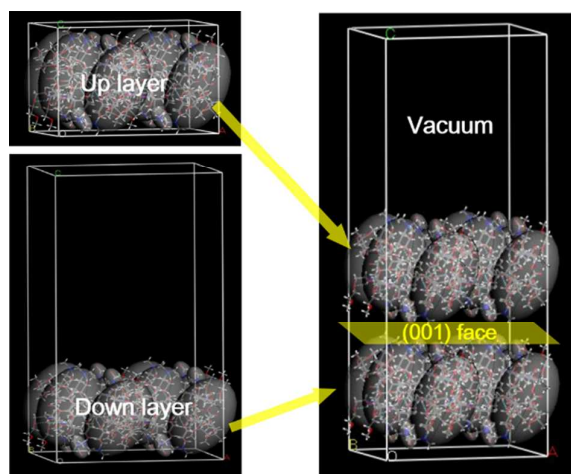

**Figure S11.** Diagram showing the oriented attachment (OA) computational model in which two cleaved supercells (up and down layer) are attached facet-to-facet on the surface (001). The ellipse displays the configuration of DMF and DIR molecule.



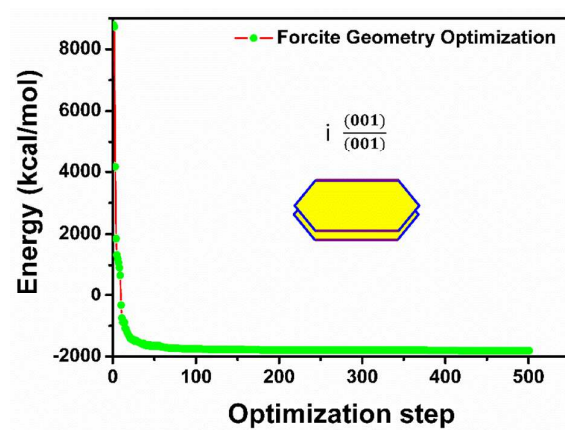

**Figure S12.** The  $E_{\text{attached}}$  of OA configuration i during Forcite Geometry Optimization.
